# Supplementary material for: Myocardial Structural and Biological Anomalies Induced by High Fat Diet in Psammomys obesus Gerbils
Source: PLoS One. 2016 Feb 3;11(2):e0148117. doi: 10.1371/journal.pone.0148117 (PMC4740502; doi:10.1371/journal.pone.0148117)
Supplement: S2 File — (XLS) [file pone.0148117.s002.xls]

## Sheet: HPRT
Hamid
2 April 2012	HPRT
			Ct1	Ct2	µ
1	Heart	C	24.4	24.7	24.55
2	Heart	C	24.7	24.6	24.65
3	Heart	C	24.6	24.5	24.55
4	Heart	C	24.7	24.8	24.75
5	Heart	HFD	23.7	23.7	23.7
6	Heart	HFD	24.6	24.6	24.6
7	Heart	HFD	24.2	24.7	24.45
8	Heart	HFD	25	24.7	24.85
9	Heart	HFD	24.6	24.3	24.45
10	Heart	HFD	27.6	27.5	27.55
11	Heart	HFD	24.2	24.3	24.25
12	Heart	HFD	24.4	24.7	24.55
13	Heart	HFD	23.7	23.7	23.7
14	Heart	HFD	24.2	24.6	24.4
15	Heart	C	24.2	24.2	24.2
16	Heart	C	24.8		24.8
17	Heart	C	24.4	24.7	24.55
18	Heart	C	24.1	24.5	24.3
19	Heart	C	26.8	26.9	26.85
20	Heart	C	24.2	24.5	24.35
21	Aorta	C	27.7	27.7	27.7

## Sheet: SERCA2A
Hamid
2 April 2012	SERCA2A
			Ct1	Ct2	µ						HPRT	SERCA2A	DCt	DDCt	2DDCt	1/2DDCt
1	Heart	C	18.6	18.6	18.6			1	Heart	C	24.55	18.6	-5.95	0	1	1
2	Heart	C	18	17.9	17.95			2	Heart	C	24.65	17.95	-6.7	-0.75	0.594604	1.68179
3	Heart	C	18.6	18.4	18.5			3	Heart	C	24.55	18.5	-6.05	-0.1	0.933033	1.07177
4	Heart	C	18.4	18.1	18.25			4	Heart	C	24.75	18.25	-6.5	-0.55	0.68302	1.46409
5	Heart	HFD	18.7	18.5	18.6			5	Heart	HFD	23.7	18.6	-5.1	0.85	1.8025	0.554785
6	Heart	HFD	18.9	18.3	18.6			6	Heart	HFD	24.6	18.6	-6	-0.05	0.965936	1.03526
7	Heart	HFD	19.5	18.9	19.2			7	Heart	HFD	24.45	19.2	-5.25	0.7	1.6245	0.615572
8	Heart	HFD	19.2	18.6	18.9			8	Heart	HFD	24.85	18.9	-5.95	0	1	1
9	Heart	HFD	18.6	18.7	18.65			9	Heart	HFD	24.45	18.65	-5.8	0.15	1.10957	0.90125
10	Heart	HFD	21.3	21.4	21.35			10	Heart	HFD	27.55	21.35	-6.2	-0.25	0.840896	1.18921
11	Heart	HFD	19.6	19.7	19.65			11	Heart	HFD	24.25	19.65	-4.6	1.35	2.54912	0.392292
12	Heart	HFD	19.3	19.4	19.35			12	Heart	HFD	24.55	19.35	-5.2	0.75	1.68179	0.594604					E	0.554785
13	Heart	HFD	18.9	18.9	18.9			13	Heart	HFD	23.7	18.9	-4.8	1.15	2.21914	0.450625					E	1.03526
14	Heart	HFD	19.6	19.7	19.65			14	Heart	HFD	24.4	19.65	-4.75	1.2	2.2974	0.435275					E	0.615572
15	Heart	C	18.6	18.6	18.6			15	Heart	C	24.2	18.6	-5.6	0.35	1.27456	0.784584					E	1
16	Heart	C	18.3	18.3	18.3			16	Heart	C	24.8	18.3	-6.5	-0.55	0.68302	1.46409					E	0.90125
17	Heart	C	18.8	18.8	18.8			17	Heart	C	24.55	18.8	-5.75	0.2	1.1487	0.870551					E	1.18921
18	Heart	C	18.4	18.4	18.4			18	Heart	C	24.3	18.4	-5.9	0.05	1.03526	0.965936					E	0.392292
19	Heart	C	21.3	21.1	21.2			19	Heart	C	26.85	21.2	-5.65	0.3	1.23114	0.812252	Control	1.07097	0.351868	0.11127	E	0.594604
20	Heart	C	19.1	19.2	19.15			20	Heart	C	24.35	19.15	-5.2	0.75	1.68179	0.594604	High fat diet	0.716888	0.287837	0.091022	E	0.450625
21	Aorta	C	N/A	N/A	#DIV/0!			21	Aorta	C	27.7		-27.7	-21.75	2.83529e-07	3.52698e+06					E	0.435275
																	Control	1	0.328552	0.103897	T	0.784584
																	High fat diet	0.669384	0.268764	0.0849906	T	1.46409
																					T	0.870551
																					T	0.965936
																					T	0.812252
																					T	0.594604
																					T	1
																					T	1.68179
																					T	1.07177
																					T	1.46409

## Sheet: RyanR
Hamid
2 April 2012	RyanR
			Ct1	Ct2	µ						HPRT	RyanR	DCt	DDCt	2DDCt	1/2DDCt
1	Heart	C	24.8	24.9	24.85			1	Heart	C	24.55	24.85	0.3	0	1	1
2	Heart	C	25.2	25.2	25.2			2	Heart	C	24.65	25.2	0.55	0.25	1.18921	0.840896
3	Heart	C	25.2	24.9	25.05			3	Heart	C	24.55	25.05	0.5	0.2	1.1487	0.870551
4	Heart	C	31	31.2	31.1			4	Heart	C	24.75	31.1	6.35	6.05	66.257	0.0150928
5	Heart	HFD	24.5	24.8	24.65			5	Heart	HFD	23.7	24.65	0.95	0.65	1.56917	0.63728
6	Heart	HFD	24.7	24.9	24.8			6	Heart	HFD	24.6	24.8	0.2	-0.1	0.933033	1.07177
7	Heart	HFD	24.9	25.2	25.05			7	Heart	HFD	24.45	25.05	0.6	0.3	1.23114	0.812252
8	Heart	HFD	24.9	24.6	24.75			8	Heart	HFD	24.85	24.75	-0.1	-0.4	0.757858	1.31951
9	Heart	HFD	25.7	25.4	25.55			9	Heart	HFD	24.45	25.55	1.1	0.8	1.7411	0.574349
10	Heart	HFD	27.2	27.4	27.3			10	Heart	HFD	27.55	27.3	-0.25	-0.55	0.68302	1.46409
11	Heart	HFD	26.2	25.9	26.05			11	Heart	HFD	24.25	26.05	1.8	1.5	2.82843	0.353553
12	Heart	HFD	25.6	25.7	25.65			12	Heart	HFD	24.55	25.65	1.1	0.8	1.7411	0.574349					E	0.63728
13	Heart	HFD	25.3	25.5	25.4			13	Heart	HFD	23.7	25.4	1.7	1.4	2.63902	0.378929					E	1.07177
14	Heart	HFD	25.9	26.2	26.05			14	Heart	HFD	24.4	26.05	1.65	1.35	2.54912	0.392292					E	0.812252
15	Heart	C	24.8	24.8	24.8			15	Heart	C	24.2	24.8	0.6	0.3	1.23114	0.812252					E	1.31951
16	Heart	C	25.2	25.3	25.25			16	Heart	C	24.8	25.25	0.45	0.15	1.10957	0.90125					E	0.574349
17	Heart	C	25.8	25.6	25.7			17	Heart	C	24.55	25.7	1.15	0.85	1.8025	0.554785					E	1.46409
18	Heart	C	25.9	25.6	25.75			18	Heart	C	24.3	25.75	1.45	1.15	2.21914	0.450625					E	0.353553
19	Heart	C	27.9	27.8	27.85			19	Heart	C	26.85	27.85	1	0.7	1.6245	0.615572	Control	0.654399	0.293986	0.0929666	E	0.574349
20	Heart	C	26	25.4	25.7			20	Heart	C	24.35	25.7	1.35	1.05	2.07053	0.482968	High fat diet	0.757837	0.399762	0.126416	E	0.378929
21	Aorta	C			#DIV/0!			21	Aorta	C	27.7	#DIV/0!	#DIV/0!	#DIV/0!	#DIV/0!	#DIV/0!					E	0.392292
																	Control	1	0.449246	0.142064	T	0.812252
																	High fat diet	1.15807	0.610884	0.193178	T	0.90125
																					T	0.554785
																					T	0.450625
																					T	0.615572
																					T	0.482968
																					T	1
																					T	0.840896
																					T	0.870551
																					T	0.0150928

## Sheet: Cacna1
Hamid
2015-05-08	Cacna1	Seui: 135.3
			Ct1	Ct2	µ						HPRT	Cacna1	DCt	DDCt	2DDCt	1/2DDCt
1	Heart	C	N/A	31.4	31.4			1	Heart	C	24.55	31.4	6.85	0	1	1
2	Heart	C	32.1	31.7	31.9			2	Heart	C	24.65	31.9	7.25	0.4	1.31951	0.757858
3	Heart	C	32.2	31.8	32			3	Heart	C	24.55	32	7.45	0.6	1.51572	0.659754
4	Heart	C	32.7	32.6	32.65			4	Heart	C	24.75	32.65	7.9	1.05	2.07053	0.482968
5	Heart	HFD	32.1	31.5	31.8			5	Heart	HFD	23.7	31.8	8.1	1.25	2.37841	0.420448
6	Heart	HFD	32.2	32.5	32.35			6	Heart	HFD	24.6	32.35	7.75	0.9	1.86607	0.535887
7	Heart	HFD	N/A	33.1	33.1			7	Heart	HFD	24.45	33.1	8.65	1.8	3.4822	0.287175
8	Heart	HFD	34	33.7	33.85			8	Heart	HFD	24.85	33.85	9	2.15	4.43828	0.225313
9	Heart	HFD	31.4	31.8	31.6			9	Heart	HFD	24.45	31.6	7.15	0.3	1.23114	0.812252
10	Heart	HFD	31.8	31.6	31.7			10	Heart	HFD	27.55	31.7	4.15	-2.7	0.153893
11	Heart	HFD	31.6	31.6	31.6			11	Heart	HFD	24.25	31.6	7.35	0.5	1.41421	0.707107
12	Heart	HFD	31.2	31.1	31.15			12	Heart	HFD	24.55	31.15	6.6	-0.25	0.840896	1.18921					E	0.63728
13	Heart	HFD	N/A	31.9	31.9			13	Heart	HFD	23.7	31.9	8.2	1.35	2.54912	0.392292					E	1.07177
14	Heart	HFD	31.7	32.7	32.2			14	Heart	HFD	24.4	32.2	7.8	0.95	1.93187	0.517632					E	0.812252
15	Heart	C	31.8	31.6	31.7			15	Heart	C	24.2	31.7	7.5	0.65	1.56917	0.63728					E	1.31951
16	Heart	C	31.6	31.2	31.4			16	Heart	C	24.8	31.4	6.6	-0.25	0.840896	1.18921					E	0.574349
17	Heart	C	31.3	30.8	31.05			17	Heart	C	24.55	31.05	6.5	-0.35	0.784584	1.27456					E	1.46409
18	Heart	C	31.4	31.5	31.45			18	Heart	C	24.3	31.45	7.15	0.3	1.23114	0.812252					E	0.353553
19	Heart	C	N/A	31.8	31.8			19	Heart	C	26.85	31.8	4.95	-1.9	0.267943		Control	0.860768	0.262139	0.0828956	E	0.574349
20	Heart	C	31.3	N/A	31.3			20	Heart	C	24.35	31.3	6.95	0.1	1.07177	0.933033	High fat diet	0.565257	0.299448	0.0946937	E	0.378929
21	Aorta	C			#DIV/0!			21	Aorta	C	27.7		-27.7	-34.55	3.9757e-11	2.51528e+10					E	0.392292
																	Control	1	0.304541	0.0963042	T	0.812252
																	High fat diet	0.656689	0.347884	0.110011	T	0.90125
																					T	0.554785
																					T	0.450625
																					T	0.615572
																					T	0.482968
																					T	1
																					T	0.840896
																					T	0.870551
																					T	0.0150928

## Sheet: aMHC
Hamid
4 April 2012	aMHC
			Ct1	Ct2	µ						HPRT	aMHC	DCt	DDCt	2DDCt	1/2DDCt
1	Heart	C	17.1	16.8	16.95			1	Heart	C	24.55	16.95	-7.6	0	1	1
2	Heart	C	17.3	17.2	17.25			2	Heart	C	24.65	17.25	-7.4	0.2	1.1487	0.870551
3	Heart	C	17.7	17.6	17.65			3	Heart	C	24.55	17.65	-6.9	0.7	1.6245	0.615572
4	Heart	C	17.3	17.6	17.45			4	Heart	C	24.75	17.45	-7.3	0.3	1.23114	0.812252
5	Heart	HFD	17.9	18.2	18.05			5	Heart	HFD	23.7	18.05	-5.65	1.95	3.86375	0.258816
6	Heart	HFD	17.9	17.6	17.75			6	Heart	HFD	24.6	17.75	-6.85	0.75	1.68179	0.594604
7	Heart	HFD	19.1	19.2	19.15			7	Heart	HFD	24.45	19.15	-5.3	2.3	4.92458	0.203063
8	Heart	HFD	18.7	18.8	18.75			8	Heart	HFD	24.85	18.75	-6.1	1.5	2.82843	0.353553
9	Heart	HFD	17.8	17.7	17.75			9	Heart	HFD	24.45	17.75	-6.7	0.9	1.86607	0.535887
10	Heart	HFD	20.7	20.8	20.75			10	Heart	HFD	27.55	20.75	-6.8	0.8	1.7411	0.574349
11	Heart	HFD	19.1	19.2	19.15			11	Heart	HFD	24.25	19.15	-5.1	2.5	5.65685	0.176777					E	0.258816
12	Heart	HFD	18.2	18.6	18.4			12	Heart	HFD	24.55	18.4	-6.15	1.45	2.73208	0.366021					E	0.594604
13	Heart	HFD	17.3	17.2	17.25			13	Heart	HFD	23.7	17.25	-6.45	1.15	2.21914	0.450625					E	0.203063
14	Heart	HFD	18.4	18.1	18.25			14	Heart	HFD	24.4	18.25	-6.15	1.45	2.73208	0.366021					E	0.353553
15	Heart	C	17.4	17.6	17.5			15	Heart	C	24.2	17.5	-6.7	0.9	1.86607	0.535887					E	0.535887
16	Heart	C	18.4	N/A	18.4			16	Heart	C	24.8	18.4	-6.4	1.2	2.2974	0.435275					E	0.574349
17	Heart	C	17.6	17.9	17.75			17	Heart	C	24.55	17.75	-6.8	0.8	1.7411	0.574349					E	0.176777
18	Heart	C	16.5	16.7	16.6			18	Heart	C	24.3	16.6	-7.7	-0.1	0.933033	1.07177					E	0.366021
19	Heart	C	20.8	20.6	20.7			19	Heart	C	26.85	20.7	-6.15	1.45	2.73208	0.366021	Control	0.683647	0.240321	0.0759961	E	0.450625
20	Heart	C	17.6	17.6	17.6			20	Heart	C	24.35	17.6	-6.75	0.85	1.8025	0.554785	High fat diet	0.387972	0.149392	0.0472419	E	0.37
21	Aorta	C	16.2	N/A	16.2			21	Aorta	C	27.7	16.2	-11.5	-3.9	0.0669858	14.9285					T	1
																	Control	1	0.351528	0.111163	T	0.870551
																	High fat diet	0.567503	0.218522	0.0691028	T	0.615572
																					T	0.812252
																					T	0.535887
																					T	0.435275
																					T	0.57
																					T	1.07177
																					T	0.37
																					T	0.554785

## Sheet: Contractility
		Average	SD	SEM
SERCA2	4-month Normal Diet	1	0.328552	0.103897
	4-month High Fat Diet	0.669384	0.268764	0.0849906	p= 0,0249
RYR2	4-month Normal Diet	1	0.449246	0.142064
	4-month High Fat Diet	1.15807	0.610884	0.193178	p= 0,5
MYH6	4-month Normal Diet	1	0.351528	0.111163
	4-month High Fat Diet	0.567503	0.218522	0.0691028	p=0,0037
AMPK	4-month Normal Diet	1	0.167343	0.0529186
	4-month High Fat Diet	0.630584	0.261363	0.0826503	p= 0,0014

## Sheet: IL6
Hamid
2 April 2012	IL6
			Ct1	Ct2	µ						HPRT	IL6	DCt	DDCt	2DDCt	1/2DDCt
1	Heart	C	35.2	33.8	34.5			1	Heart	C	24.55	34.5	9.95	0	1	1
2	Heart	C	35.3	35.3	35.3			2	Heart	C	24.65	35.3	10.65	0.7	1.6245	0.615572
3	Heart	C	35.7	33.9	34.8			3	Heart	C	24.55	34.8	10.25	0.3	1.23114	0.812252
4	Heart	C	N/A	36.5	36.5			4	Heart	C	24.75	36.5	11.75	1.8	3.4822	0.287175
5	Heart	HFD	35	34.5	34.75			5	Heart	HFD	23.7	34.75	11.05	1.1	2.14355	0.466516
6	Heart	HFD	35.4	34.4	34.9			6	Heart	HFD	24.6	34.9	10.3	0.35	1.27456	0.784584
7	Heart	HFD	35.8	36.2	36			7	Heart	HFD	24.45	36	11.55	1.6	3.03143	0.329877
8	Heart	HFD	35.7	34.1	34.9			8	Heart	HFD	24.85	34.9	10.05	0.1	1.07177	0.933033
9	Heart	HFD	36.6	N/A	36.6			9	Heart	HFD	24.45	36.6	12.15	2.2	4.59479	0.217638
10	Heart	HFD	30.1	30.1	30.1			10	Heart	HFD	27.55	30.1	2.55	-7.4	0.00592077	168.897
11	Heart	HFD	33.7	36	34.85			11	Heart	HFD	24.25	34.85	10.6	0.65	1.56917	0.63728
12	Heart	HFD	36.5	37	36.75			12	Heart	HFD	24.55	36.75	12.2	2.25	4.75683	0.210224
13	Heart	HFD	35.3	34.9	35.1			13	Heart	HFD	23.7	35.1	11.4	1.45	2.73208	0.366021
14	Heart	HFD	32.7	33.6	33.15			14	Heart	HFD	24.4	33.15	8.75	-1.2	0.435275	2.2974
15	Heart	C	N/A	38.3	38.3			15	Heart	C	24.2	38.3	14.1	4.15	17.7531	0.0563282
16	Heart	C	N/A	N/A	#DIV/0!			16	Heart	C	24.8	#DIV/0!	#DIV/0!	#DIV/0!	#DIV/0!
17	Heart	C	33.6	32.7	33.15			17	Heart	C	24.55	33.15	8.6	-1.35	0.392292	2.54912
18	Heart	C	N/A	38.4	38.4			18	Heart	C	24.3	38.4	14.1	4.15	17.7531	0.0563282
19	Heart	C	29.5	29.7	29.6			19	Heart	C	26.85	29.6	2.75	-7.2	0.00680118	147.033	Control	0.682769	0.836952	0.264667
20	Heart	C	38	37.7	37.85			20	Heart	C	24.35	37.85	13.5	3.55	11.7127	0.0853775	High fat diet	0.693619	0.651182	0.205922
21	Aorta	C	N/A	N/A	#DIV/0!			21	Aorta	C	27.7	#DIV/0!	#DIV/0!	#DIV/0!	#DIV/0!
																	Control	1	1.22582	0.387638
																	High fat diet	1.01589	0.953736	0.301598

## Sheet: IL1beta
Hamid
5 June 2012	IL1beta
			Ct1	Ct2	µ						HPRT	IL1beta	DCt	DDCt	2DDCt	1/2DDCt
1	Heart	C	35.6	35.5	35.55			1	Heart	C	24.55	35.55	11	1.3	2.46229	0.406126
2	Heart	C	34.6	34.1	34.35			2	Heart	C	24.65	34.35	9.7	0	1	0
3	Heart	C	35.9	36	35.95			3	Heart	C	24.55	35.95	11.4	1.7	3.24901	0.307786
4	Heart	C	36.6	36.4	36.5			4	Heart	C	24.75	36.5	11.75	2.05	4.14106	0
5	Heart	HFD	34.2	34.3	34.25			5	Heart	HFD	23.7	34.25	10.55	0.85	1.8025	0.554785
6	Heart	HFD	33.5	33.2	33.35			6	Heart	HFD	24.6	33.35	8.75	-0.95	0.517632	1.93187
7	Heart	HFD	33.5	33.3	33.4			7	Heart	HFD	24.45	33.4	8.95	-0.75	0.594604	1.68179
8	Heart	HFD	33.3	N/A	33.3			8	Heart	HFD	24.85	33.3	8.45	-1.25	0.420448	2.37841
9	Heart	HFD	N/A	N/A	#DIV/0!			9	Heart	HFD	24.45			-9.7
10	Heart	HFD	31.4	31	31.2			10	Heart	HFD	27.55	31.2	3.65	-6.05	0.0150928	66.257
11	Heart	HFD	34.6	34.3	34.45			11	Heart	HFD	24.25	34.45	10.2	0.5	1.41421	0.707107					C	0.406126
12	Heart	HFD	35.9	35.5	35.7			12	Heart	HFD	24.55	35.7	11.15	1.45	2.73208	0.366021					C	0
13	Heart	HFD	34	34.3	34.15			13	Heart	HFD	23.7	34.15	10.45	0.75	1.68179	0.594604					C	0.307786
14	Heart	HFD	33.5	33.6	33.55			14	Heart	HFD	24.4	33.55	9.15	-0.55	0.68302	1.46409					C	0
15	Heart	C	37.4	37.6	37.5			15	Heart	C	24.2	37.5	13.3	3.6	12.1257	0.0824692					C	0.0824692
16	Heart	C	34.9	N/A	34.9			16	Heart	C	24.8	34.9	10.1	0.4	1.31951	0.757858					C	0.757858
17	Heart	C	33.8	33.8	33.8			17	Heart	C	24.55	33.8	9.25	-0.45	0.732043	1.36604					C	1.36604
18	Heart	C	36.3	36.6	36.45			18	Heart	C	24.3	36.45	12.15	2.45	5.46416	0.183011					C	0.183011
19	Heart	C	31	29.9	30.45			19	Heart	C	26.85	30.45	3.6	-6.1	0.0145786	68.5935	Control	0.356489	0.448284	0.14176	C	0.105112
20	Heart	C	37.4	37.2	37.3			20	Heart	C	24.35	37.3	12.95	3.25	9.51366	0.105112	High fat diet	1.20984	0.750872	0.237447	HFD	0.554785
21	Aorta	C	29.5	29.9	29.7			21	Aorta	C	27.7	29.7	2	-7.7	0.00480916	207.937					HFD	1.93187
																	Control	1	1.2575	0.397655	HFD	1.68179
																	High fat diet	3.39375	2.1063	0.666069	HFD	2.37841
																					HFD	0.707107
																					HFD	0.366021
																					HFD	0.594604
																					HFD	1.46409

## Sheet: TNFa
Hamid
3 April 2012	TNF alpha
			Ct1	Ct2	µ						HPRT	TNF alpha	DCt	DDCt	2DDCt	1/2DDCt
1	Heart	C	35.9	36	35.95			1	Heart	C	24.55	35.95	11.4	0.5	1.41421	0.707107
2	Heart	C	36.4	36	36.2			2	Heart	C	24.65	36.2	11.55	0.65	1.56917	0.63728
3	Heart	C	36	35.6	35.8			3	Heart	C	24.55	35.8	11.25	0.35	1.27456	0.784584
4	Heart	C	36.1	35.7	35.9			4	Heart	C	24.75	35.9	11.15	0.25	1.18921	0.840896
5	Heart	HFD	34.6	34.6	34.6			5	Heart	HFD	23.7	34.6	10.9	0	1	1
6	Heart	HFD	36.1	35.7	35.9			6	Heart	HFD	24.6	35.9	11.3	0.4	1.31951	0.757858
7	Heart	HFD	36	36	36			7	Heart	HFD	24.45	36	11.55	0.65	1.56917	0.63728
8	Heart	HFD	35.8	35.8	35.8			8	Heart	HFD	24.85	35.8	10.95	0.05	1.03526	0.965936
9	Heart	HFD	36.1	36.1	36.1			9	Heart	HFD	24.45	36.1	11.65	0.75	1.68179	0.594604
10	Heart	HFD	34.5	34.5	34.5			10	Heart	HFD	27.55	34.5	6.95	-3.95	0.0647041	15.455
11	Heart	HFD	35.7	35.7	35.7			11	Heart	HFD	24.25	35.7	11.45	0.55	1.46409	0.68302					E	1
12	Heart	HFD	35.7	35.7	35.7			12	Heart	HFD	24.55	35.7	11.15	0.25	1.18921	0.840896					E	0.757858
13	Heart	HFD	34.9	34.8	34.85			13	Heart	HFD	23.7	34.85	11.15	0.25	1.18921	0.840896					E	0.63728
14	Heart	HFD	34.5	34.3	34.4			14	Heart	HFD	24.4	34.4	10	-0.9	0.535887	1.86607					E	0.965936
15	Heart	C	37.1	37.1	37.1			15	Heart	C	24.2	37.1	12.9	2	4	0.25					E	0.594604
16	Heart	C	37.2	37.3	37.25			16	Heart	C	24.8	37.25	12.45	1.55	2.92817	0.34151					E	0.68302
17	Heart	C	35.8	35.1	35.45			17	Heart	C	24.55	35.45	10.9	0	1	1					E	0.840896
18	Heart	C	37.5	37.6	37.55			18	Heart	C	24.3	37.55	13.25	2.35	5.09824	0.196146					E	0.840896
19	Heart	C	33.7	33.6	33.65			19	Heart	C	26.85	33.65	6.8	-4.1	0.0583146	17.1484	Control	0.566559	0.290287	0.0917968	E	1.86607
20	Heart	C	36.8	36.8	36.8			20	Heart	C	24.35	36.8	12.45	1.55	2.92817	0.34151	High fat diet	0.909617	0.384603	0.121622	T	0.25
21	Aorta	C	32.6	N/A	32.6			21	Aorta	C	27.7	32.6	4.9	-6	0.015625	64					T	0.34151
																	Control	1	0.512368	0.162025	T	1
																	High fat diet	1.60551	0.678841	0.214668	T	0.196146
																					T	0.34151
																					T	0.707107
																					T	0.63728
																					T	0.784584
																					T	0.840896

## Sheet: ICAM1
Hamid
4 April 2012	ICAM1
			Ct1	Ct2	µ						HPRT	ICAM1	DCt	DDCt	2DDCt	1/2DDCt
1	Heart	C	35.4	35.3	35.35			1	Heart	C	24.55	35.35	10.8	0	1	1
2	Heart	C	36.5	36.5	36.5			2	Heart	C	24.65	36.5	11.85	1.05	2.07053	0.482968
3	Heart	C	36.4	36.5	36.45			3	Heart	C	24.55	36.45	11.9	1.1	2.14355	0.466516
4	Heart	C	N/A	36.9	36.9			4	Heart	C	24.75	36.9	12.15	1.35	2.54912	0.392292
5	Heart	HFD	34.6	34.4	34.5			5	Heart	HFD	23.7	34.5	10.8	0	1	1
6	Heart	HFD	35.6	35.8	35.7			6	Heart	HFD	24.6	35.6	11	0.2	1.1487	0.870551
7	Heart	HFD	35.4	35.2	35.3			7	Heart	HFD	24.45	35.3	10.85	0.05	1.03526	0.965936
8	Heart	HFD	35.6	35.3	35.45			8	Heart	HFD	24.85	35.45	10.6	-0.2	0.870551	1.1487
9	Heart	HFD	N/A	34.9	34.9			9	Heart	HFD	24.45	34.9	10.45	-0.35	0.784584	1.27456
10	Heart	HFD	30.8	30.8	30.8			10	Heart	HFD	27.55	30.8	3.25	-7.55	0.00533609	187.403
11	Heart	HFD	35.4	35	35.2			11	Heart	HFD	24.25	35.2	10.95	0.15	1.10957	0.90125					HFD	1
12	Heart	HFD	35.2	N/A	35.2			12	Heart	HFD	24.55	35.2	10.65	-0.15	0.90125	1.10957					HFD	0.870551
13	Heart	HFD	33.8	33.8	33.8			13	Heart	HFD	23.7	33.8	10.1	-0.7	0.615572	1.6245					HFD	0.965936
14	Heart	HFD	33.3	33.3	33.3			14	Heart	HFD	24.4	33.3	8.9	-1.9	0.267943	3.73213					HFD	1.1487
15	Heart	C	38.5	N/A	38.5			15	Heart	C	24.2	38.5	14.3	3.5	11.3137	0.0883883					HFD	1.27
16	Heart	C	N/A	N/A	#DIV/0!			16	Heart	C	24.8	#DIV/0!	#DIV/0!	#DIV/0!	#DIV/0!						HFD	0.90125
17	Heart	C	35.1	34.8	34.95			17	Heart	C	24.55	34.95	10.4	-0.4	0.757858	1.31951					HFD	1.10957
18	Heart	C	N/A	N/A	#DIV/0!			18	Heart	C	24.3	#DIV/0!	#DIV/0!	#DIV/0!	#DIV/0!						HFD	1.6245
19	Heart	C	31	31.5	31.25			19	Heart	C	26.85	31.25	4.4	-6.4	0.0118415	84.4485	Control	0.591709	0.419674	0.132712	HFD	3.73213
20	Heart	C	37.1	35.9	36.5			20	Heart	C	24.35	36.5	12.15	1.35	2.54912	0.392292	High fat diet	1.40302	0.903457	0.285698	C	0.0883883
21	Aorta	C			#DIV/0!			21	Aorta	C	27.7		-27.7	-38.5	2.57244e-12	3.88736e+11					C	1.31951
																	Control	1	0.709257	0.224287	C	0.392292
																	High fat diet	2.37113	1.52686	0.482835	C	1
																					C	0.482968
																					C	0.466516
																					C	0.392292

[truncated: 9 more sheets: VCAM1, Inflammation, Bax, Bcl2, Bax-Bcl2, Apoptosis, HIF1a, Hypetrophie, Bilan]
